# Supplementary material for: Testing of Alignment Parameters for Ancient Samples: Evaluating and Optimizing Mapping Parameters for Ancient Samples Using the TAPAS Tool
Source: MDPI journal article supplement (doi:10.3390/genes9030157), 2018-03-13
Supplement: s1 [file s1]

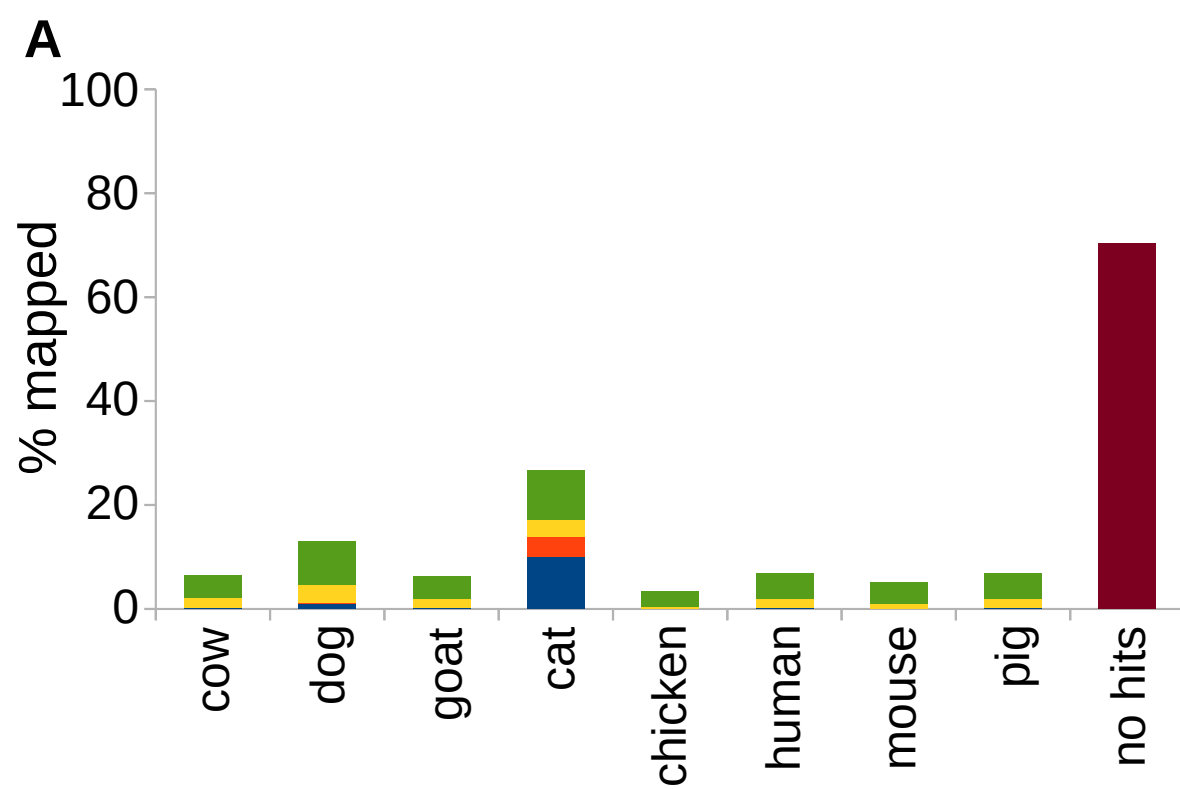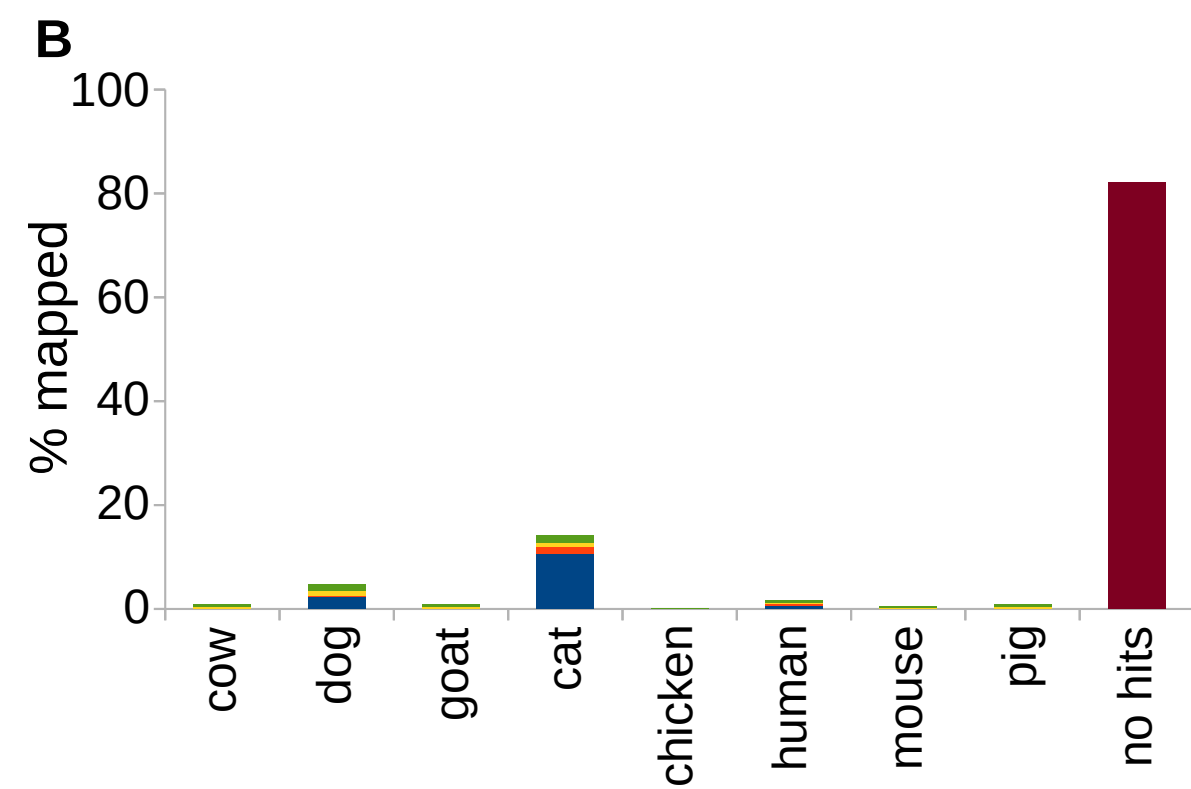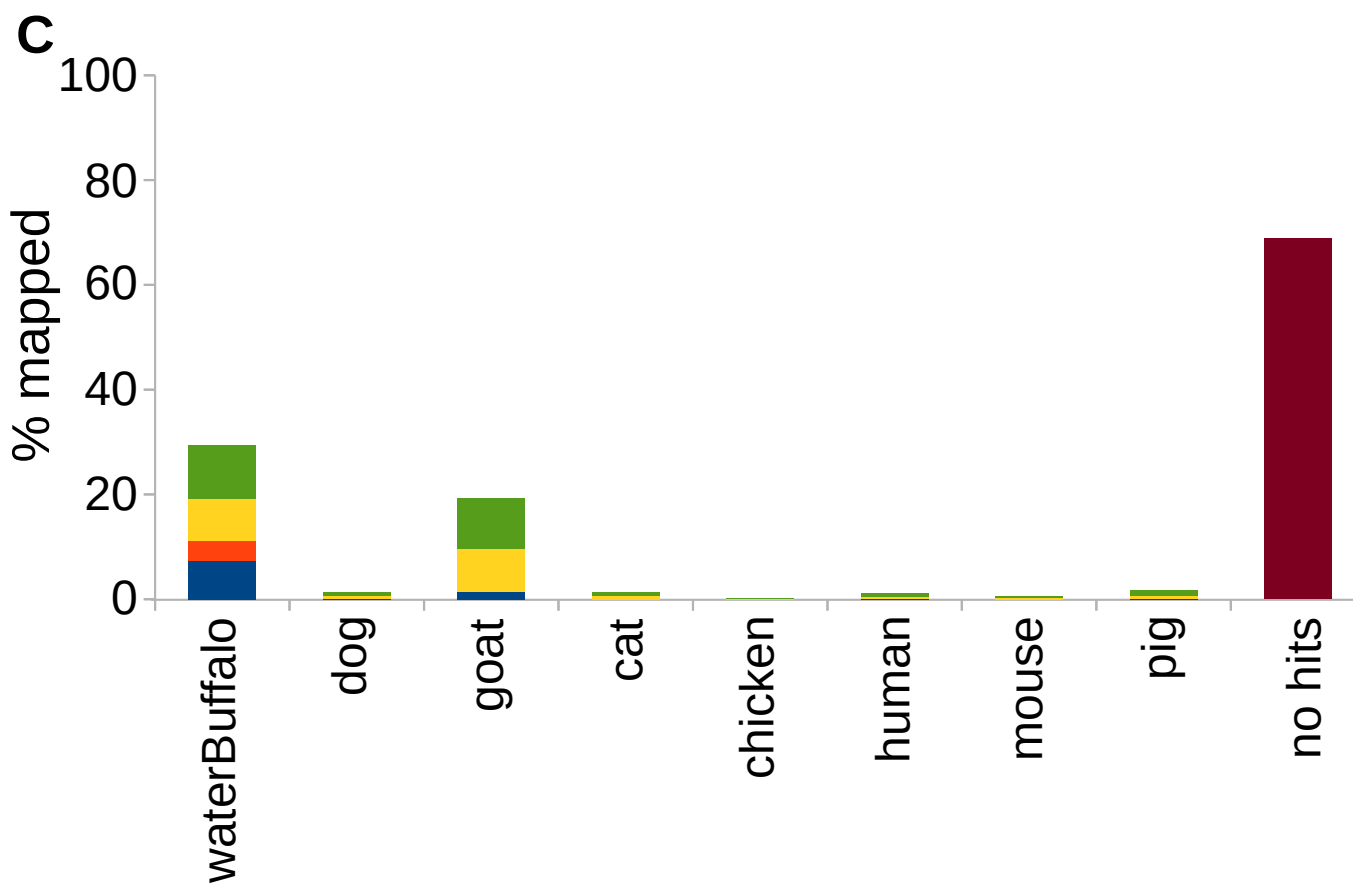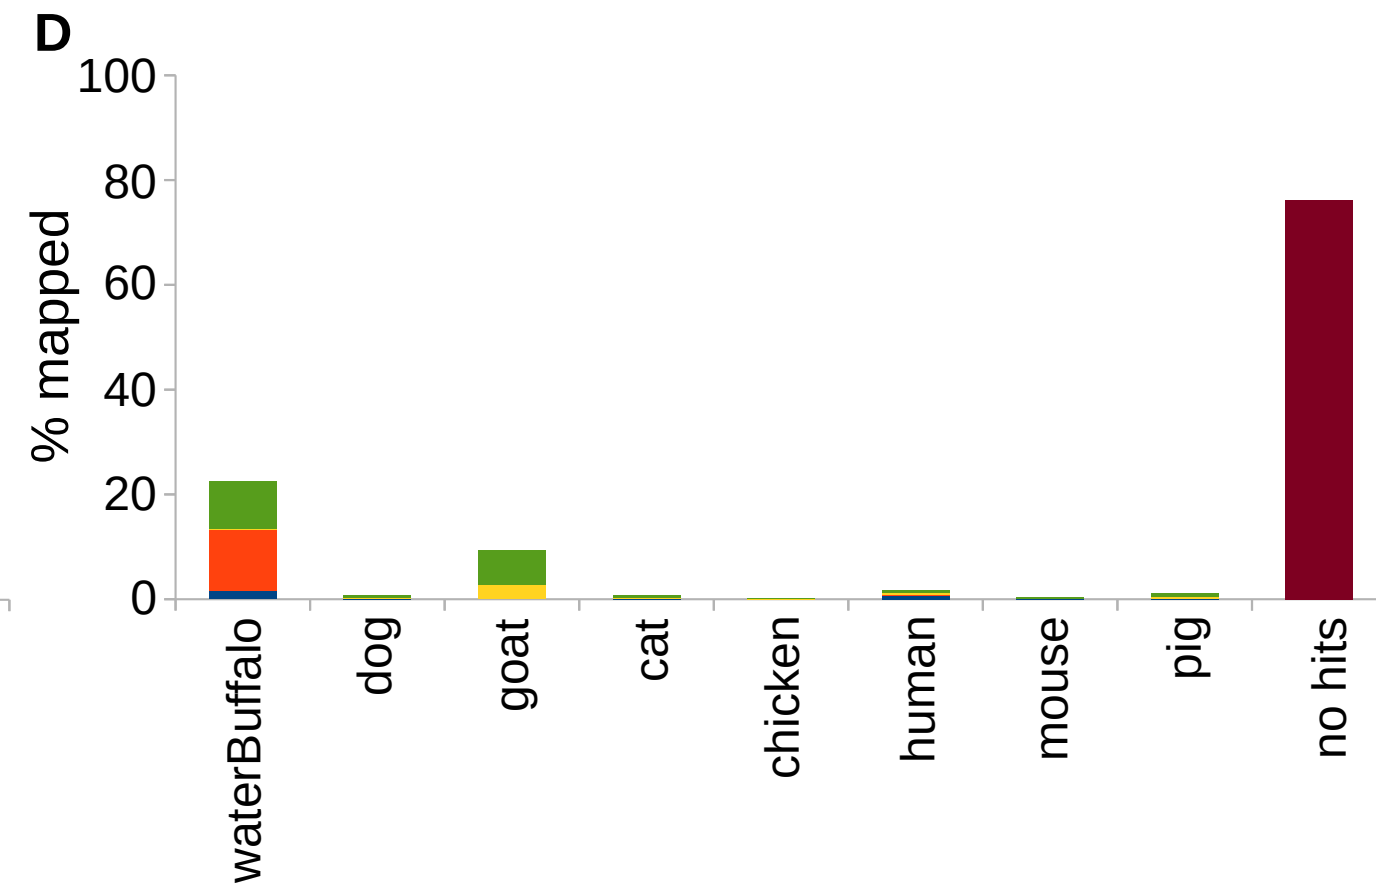

■ Multiple hits/Multiple genomes    ■ One hit/Multiple genomes    ■ No hits  
 ■ Multiple hits/One genome    ■ One hit/One genome
