# Supplementary material for: Testing of Alignment Parameters for Ancient Samples: Evaluating and Optimizing Mapping Parameters for Ancient Samples Using the TAPAS Tool
Source: Genes (Basel). 2018 Mar 13;9(3):157. doi: 10.3390/genes9030157 (PMC5867878; doi:10.3390/genes9030157)
Supplement: Supplementary file 1 [file genes-09-00157-s001.zip]

Archive with 5 entries (5 files):
- TAPAS_FigureS1_FastQScreen_12Mar2018.pdf
- TAPAS_FigureS2_mapDamage_12Mar2018.pdf
- TAPAS_FigureS3_Runtime_Linsang_12Mar2018.pdf
- TAPAS_FileS1_12Mar2018.pdf
- TAPAS_Supplementary_Tables_S1-6_12Mar2018.xlsx
