# Supplementary material for: Testing of Alignment Parameters for Ancient Samples: Evaluating and Optimizing Mapping Parameters for Ancient Samples Using the TAPAS Tool
Source: Genes (Basel). 2018 Mar 13;9(3):157. doi: 10.3390/genes9030157 (PMC5867878; doi:10.3390/genes9030157)
Supplement: Supplementary file 1 [file genes-09-00157-s001.zip › TAPAS_Supplementary_Tables_S1-6_12Mar2018.xlsx]

## Sheet: Table_S1
Table S1: Genomes used to assemble the simulated datasets. Fractions of the endogenous and contaminant sequences were estimated from the in vivo data (described in Materials & Methods in main text).
dataset	read names	genome	endogenous/contaminant	fraction
Linsang	cat	Felis catusv6.2 (GCA_000181335.2)	endogenous	0.26
	human	Homo sapiens (GrCH38)	contaminant	0.01
	dog	Canis lupus familiaris v3.1 (GCA_000002285.2)	contaminant	0.03
	Retli	Rhizobium etli (ASM9204v1)	contaminant	0.14
	Axylo	Achromobacter xylosoxidans (NZ_LN831029.1)	contaminant	0.14
	Aory	Aspergillus oryzae (ASM18445v3)	contaminant	0.14
	Glozo	Glarea lozoyensis (GCF_000409485.1 (GLAREA))	contaminant	0.14
	Pchry	Penicillium chrysogenum (ASM71027v1)	contaminant	0.14
Bison	WaterBuffalo	UMD_CASPUR_WB_2.0 (GCF_000471725.1)	endogenous	0.3
	human	Homo sapiens (GrCH38)	contaminant	0.01
	Pputi	Pseudomonas putida NBRC 14164 (NC_002947.4)	contaminant	0.115
	Mfort	Mycobacterium fortuitum (NZ_CP011269.1)	contaminant	0.115
	Salbu	Streptomyces albus strain DSM 41398 (NZ_CP010519.1)	contaminant	0.115
	Aory	Aspergillus oryzae (ASM18445v3)	contaminant	0.115
	Glozo	Glarea lozoyensis (GCF_000409485.1 (GLAREA))	contaminant	0.115
	Pchry	Penicillium chrysogenum (ASM71027v1)	contaminant	0.115

## Sheet: Table_S2
Table S2: Genomes included in the database for screening in vivo generated and simulated reads with FastQ Screen.
dataset	species	genome
Linsang	Cow (Bos taurus)	UMD3.1 (GCF_000003055.6)
	Dog (Canis lupus familiaris)	CanFam3.1 (GCA_000002285.2))
	Goat (Capra hircus)	CHIR_1.0 (GCF_000317765.1)
	Cat (Felis catus)	Felis_catus_6.2 (GCA_000181335.2)
	Chicken (Gallus gallus)	Gallus_gallus-5.0 (GCA_000002315.3)
	Human (Homo sapiens)	GrCh38
	Mouse (Mus musculus)	GRCm38
	Pig (Sus scrofa)	Sscrofa10.2 (NC_010452.3)
Bison	Water Buffalo (Bubalus bubalis)	UMD_CASPUR_WB_2.0 (GCF_000471725.1)
	Dog (Canis lupus familiaris)	CanFam3.1 (GCA_000002285.2))
	Goat (Capra hircus)	CHIR_1.0 (GCF_000317765.1)
	Cat (Felis catus)	Felis_catus_6.2 (GCA_000181335.2)
	Chicken (Gallus gallus)	Gallus_gallus-5.0 (GCA_000002315.3)
	Human (Homo sapiens)	GrCh38
	Mouse (Mus musculus)	GRCm38
	Pig (Sus scrofa)	Sscrofa10.2 (NC_010452.3)

## Sheet: Table_S3
Table S3: Values of mapping parameters systematically tested with TAPAS. The default settings of BWA aln are indicated with an asterisk.
parameter	command option	values tested
mismatch value	n	0.0001, 0.0004, 0.001, 0.004, 0.01, 0.04*, 0.07, 0.1, 0.15, 0.2
seed length	l	19, 32*, 999

## Sheet: Table_S4
Table S4: Summary of the total number of endogenous (endo) and contaminant (exo) reads mapped correctly and incorrectly filtered for mapping quality (≥30; <30) for 30 mapping runs with BWA aln using 30 different combinations of the mapping parameters mismatch value (n) and seed length (l) for the simulated linsang data.
runidx	l	n	endo total	endo ≥30 total	endo ≥30 correct	sensitivity ≥30	endo ≥30 incorrect	endo <30 total	endo <30 correct	endo <30 incorrect	endo unmapped	exo total	exo ≥30 total	exo ≥30 correct	exo ≥30 incorrect	exo <30 total	exo <30 correct	exo <30 incorrect	exo unmapped	specificity	CPU time total [s]	duplication ≥30 [%]
0	19	0.0001	260000	209440	208974	0.803746	466	50560	11764	13166	25630	740000	12992	0	12992	727008	0	14364	712644	0.963032	5647.76	1.23
1	19	0.0004		204676	204328	0.785877	348	55324	14806	12916	27602		9030	0	9030	730970	0	10298	720672	0.973881	4807.45	1.22
2	19	0.001		198387	198158	0.762146	229	61613	18704	12616	30293		5465	0	5465	734535	0	6761	727774	0.983478	4851.98	1.21
3	19	0.004		182345	182183	0.700704	162	77655	27750	12253	37652		3572	0	3572	736428	0	4784	731644	0.988708	4019.71	1.13
4	19	0.01		162505	162370	0.6245	135	97495	38113	11894	47488		2502	0	2502	737498	0	3692	733806	0.99163	2820.22	1.03
5	19	0.04		117404	117308	0.451185	96	142596	56206	10622	75768		1353	0	1353	738647	0	2306	736341	0.995055	939.739	0.78
6	19	0.07		95284	95197	0.366142	87	164716	61854	10003	92859		1089	0	1089	738911	0	2071	736840	0.99573	300.764	0.67
7	19	0.1		84721	84634	0.325515	87	175279	62896	9721	102662		1011	0	1011	738989	0	2017	736972	0.995908	231.519	0.6
8	19	0.15		62742	62683	0.241088	59	197258	64014	8573	124671		683	0	683	739317	0	1411	737906	0.99717	106.736	0.49
9	19	0.2		45609	45554	0.175208	55	214391	62573	7596	144222		506	0	506	739494	0	1175	738319	0.997728	86.112	0.37
10	32	0.0001		184888	184442	0.709392	446	75112	8591	11810	54711		7231	0	7231	732769	0	7104	725665	0.980628	61246.2	1.14
11	32	0.0004		182869	182484	0.701862	385	77131	10085	11770	55276		6492	0	6492	733508	0	6331	727177	0.982672	50515.9	1.12
12	32	0.001		179751	179413	0.69005	338	80249	12310	11706	56233		5056	0	5056	734944	0	5864	729080	0.985243	14539.9	1.12
13	32	0.004		169902	169634	0.652438	268	90098	18381	11513	60204		3057	0	3057	736943	0	3624	733319	0.990972	4740.67	1.08
14	32	0.01		157464	157258	0.604838	206	102536	26417	11290	64829		2420	0	2420	737580	0	3178	734402	0.992435	2803.11	1.01
15	32	0.04		116970	116857	0.44945	113	143030	48967	10481	83582		1331	0	1331	738669	0	2162	736507	0.99528	352.091	0.78
16	32	0.07		95162	95076	0.365677	86	164838	59159	9893	95786		1082	0	1082	738918	0	2047	736871	0.995772	230.462	0.67
17	32	0.1		84687	84600	0.325385	87	175313	61715	9613	103985		1004	0	1004	738996	0	2011	736985	0.995926	196.756	0.6
18	32	0.15		62734	62674	0.241054	60	197266	63618	8532	125116		681	0	681	739319	0	1409	737910	0.997176	98.644	0.49
19	32	0.2		45609	45554	0.175208	55	214391	62467	7561	144363		505	0	505	739495	0	1174	738321	0.997731	63.696	0.37
20	999	0.0001		177120	177069	0.681035	51	82880	10344	11720	60816		7681	0	7681	732319	0	7801	724518	0.979078	360175	1.1
21	999	0.0004		196304	196241	0.754773	63	63696	16689	12129	34878		8303	0	8303	731697	0	8627	723070	0.977122	435892	1.2
22	999	0.001		198232	198160	0.762154	72	61768	22549	12390	26829		6291	0	6291	733709	0	8286	725423	0.980301	199962	1.2
23	999	0.004		184497	184424	0.709323	73	75503	32448	12329	30726		3851	0	3851	736149	0	5639	730510	0.987176	34561.6	1.13
24	999	0.01		163473	163378	0.628377	95	96527	42436	11894	42197		2586	0	2586	737414	0	4037	733377	0.99105	7962.57	1.03
25	999	0.04		117500	117409	0.451573	91	142500	57893	10676	73931		1355	0	1355	738645	0	2334	736311	0.995015	843.684	0.77
26	999	0.07		95310	95225	0.36625	85	164690	62585	9929	92176		1087	0	1087	738913	0	2083	736830	0.995716	256.31	0.67
27	999	0.1		84730	84644	0.325554	86	175270	63208	9699	102363		1010	0	1010	738990	0	2026	736964	0.995897	364.534	0.6
28	999	0.15		62744	62686	0.2411	58	197256	64209	8467	124580		683	0	683	739317	0	1411	737906	0.99717	93.445	0.49
29	999	0.2		45611	45555	0.175212	56	214389	62665	7536	144188		506	0	506	739494	0	1175	738319	0.997728	57.163	0.37

## Sheet: Table_S5
Table S5: Summary of mapping results for in vivo generated data mapped with two sets of mapping parameters in comparison to mapping runs with simulated data applying the same mapping parameters for the bison data. n = mismatch value, l = seed length, * default mapping parameters of BWA aln, ⁺ random subsample of ten miollion reads
	n	l	reads for mapping	duplicates [%]	reads mapped	reads mapped [%]	mapped bp	coverage	median read length	total CPU time [h]
in vivo⁺ generated data	0.04*	32*	10000000	0.4	1558212	15.58	95772514	0.0337683	65	3.19
	0.0004	19	10000000	0.51	2156754	21.57	133288009	0.0469958	66	18.96
	fold increase			1.275	1.38412	1.38447	1.39171	1.39171	1.01538	5.94357
simulated data	0.04*	32*	1000000	0.41	23430	2.343	1290364	0.000454968	56	0.11
	0.0004	19	1000000	0.45	34593	3.4593	1842921	0.000649793	55	1.19
	fold increase			1.09756	1.47644	1.47644	1.42822	1.42822	0.982143	10.8182

## Sheet: Table_S6
Table S6: Summary of the total number of endogenous (endo) and contaminant (exo) reads mapped correctly and incorrectly filtered for mapping quality (≥30; <30) for 30 mapping runs with BWA aln using 30 different combinations of the mapping parameters mismatch value (n) and seed length (l) for the simulated bison data.
	l	n	endo total	endo ≥30 total	endo ≥30 correct	sensitivity ≥30	endo ≥30 incorrect	endo <30 total	endo <30 correct	endo <30 incorrect	endo unmapped	exo total	exo ≥30 total	exo ≥30 correct	exo ≥30 incorrect	exo <30 total	exo <30 correct	exo <30 incorrect	exo unmapped	specificity	CPU time total [s]	duplication ≥30 [%]
0	19	0.0001	300000	32169	31474	0.104913	695	267831	78451	182830	6550	700000	4734	0	4734	695266	0	5842	689424	0.984891	4792.42	0.49
1	19	0.0004		31798	31174	0.103913	624	268202	78250	182691	7261		2989	0	2989	697011	0	3733	693278	0.990397	4291.44	0.45
2	19	0.001		31161	30625	0.102083	536	268839	78189	182128	8522		1329	0	1329	698671	0	1869	696802	0.995431	4030.97	0.44
3	19	0.004		29505	29083	0.0969433	422	270495	78337	179743	12415		645	0	645	699355	0	1076	698279	0.997541	3762.44	0.44
4	19	0.01		27746	27383	0.0912767	363	272254	77881	177141	17232		365	0	365	699635	0	691	698944	0.998491	2871.21	0.45
5	19	0.04		22284	22011	0.07337	273	277716	74761	166432	36523		135	0	135	699865	0	301	699564	0.999377	743.773	0.44
6	19	0.07		18284	18066	0.06022	218	281716	70929	156975	53812		107	0	107	699893	0	254	699639	0.999484	315.969	0.3
7	19	0.1		16762	16554	0.05518	208	283238	68935	151884	62419		96	0	96	699904	0	252	699652	0.999503	189.42	0.31
8	19	0.15		13430	13221	0.04407	209	286570	64156	139687	82727		43	0	43	699957	0	164	699793	0.999704	147.929	0.25
9	19	0.2		10382	10171	0.0339033	211	289618	57735	127649	104234		31	0	31	699969	0	129	699840	0.999771	82.499	0.13
10	32	0.0001		32914	30664	0.102213	2250	267086	69889	172253	24944		2736	0	2736	697264	0	3282	693982	0.991403	36900.3	0.4
11	32	0.0004		32647	30544	0.101813	2103	267353	69882	172233	25238		2292	0	2292	697708	0	2447	695261	0.99323	27020.7	0.39
12	32	0.001		32200	30243	0.10081	1957	267800	70015	171972	25813		1415	0	1415	698585	0	1881	696704	0.995291	7234.81	0.4
13	32	0.004		30835	29213	0.0973767	1622	269165	70426	170739	28000		517	0	517	699483	0	877	698606	0.998009	2716.57	0.4
14	32	0.01		29322	27970	0.0932333	1352	270678	70715	169505	30458		339	0	339	699661	0	650	699011	0.998587	793.593	0.42
15	32	0.04		23401	22666	0.0755533	735	276599	70394	162644	43561		137	0	137	699863	0	279	699584	0.999406	392.686	0.41
16	32	0.07		18812	18410	0.0613667	402	281188	68989	155212	56987		109	0	109	699891	0	249	699642	0.999489	265.411	0.3
17	32	0.1		17048	16750	0.0558333	298	282952	67714	150966	64272		98	0	98	699902	0	249	699653	0.999504	214.407	0.31
18	32	0.15		13522	13287	0.04429	235	286478	63516	139589	83373		44	0	44	699956	0	163	699793	0.999704	141.541	0.24
19	32	0.2		10382	10171	0.0339033	211	289618	57735	127649	104234		31	0	31	699969	0	129	699840	0.999771	93.931	0.13
20	999	0.0001		27506	27445	0.0914833	61	272494	71527	169988	30979		3117	0	3117	696883	0	3657	693226	0.990323	403138	0.38
21	999	0.0004		29373	29301	0.09767	72	270627	77341	177710	15576		2916	0	2916	697084	0	3146	693938	0.99134	445712	0.41
22	999	0.001		30360	30280	0.100933	80	269640	80665	182818	6157		1671	0	1671	698329	0	2471	695858	0.994083	170786	0.45
23	999	0.004		28989	28905	0.09635	84	271011	80525	182103	8383		712	0	712	699288	0	1344	697944	0.997063	25553.9	0.45
24	999	0.01		27292	27180	0.0906	112	272708	79977	178748	13983		376	0	376	699624	0	773	698851	0.998359	7242.97	0.46
25	999	0.04		22053	21869	0.0728967	184	277947	75548	167322	35077		134	0	134	699866	0	317	699549	0.999356	824.536	0.45
26	999	0.07		18178	17985	0.05995	193	281822	71546	157110	53166		108	0	108	699892	0	255	699637	0.999481	318.358	0.31
27	999	0.1		16705	16511	0.0550367	194	283295	69252	152011	62032		96	0	96	699904	0	252	699652	0.999503	190.294	0.32
28	999	0.15		13417	13211	0.0440367	206	286583	63948	140016	82619		43	0	43	699957	0	164	699793	0.999704	147.482	0.25
29	999	0.2		10382	10171	0.0339033	211	289618	57735	127649	104234		31	0	31	699969	0	129	699840	0.999771	83.1	0.13
