# Supplementary figures and images for: Testing of Alignment Parameters for Ancient Samples: Evaluating and Optimizing Mapping Parameters for Ancient Samples Using the TAPAS Tool
Source: MDPI journal article supplement (doi:10.3390/genes9030157), 2018-03-13

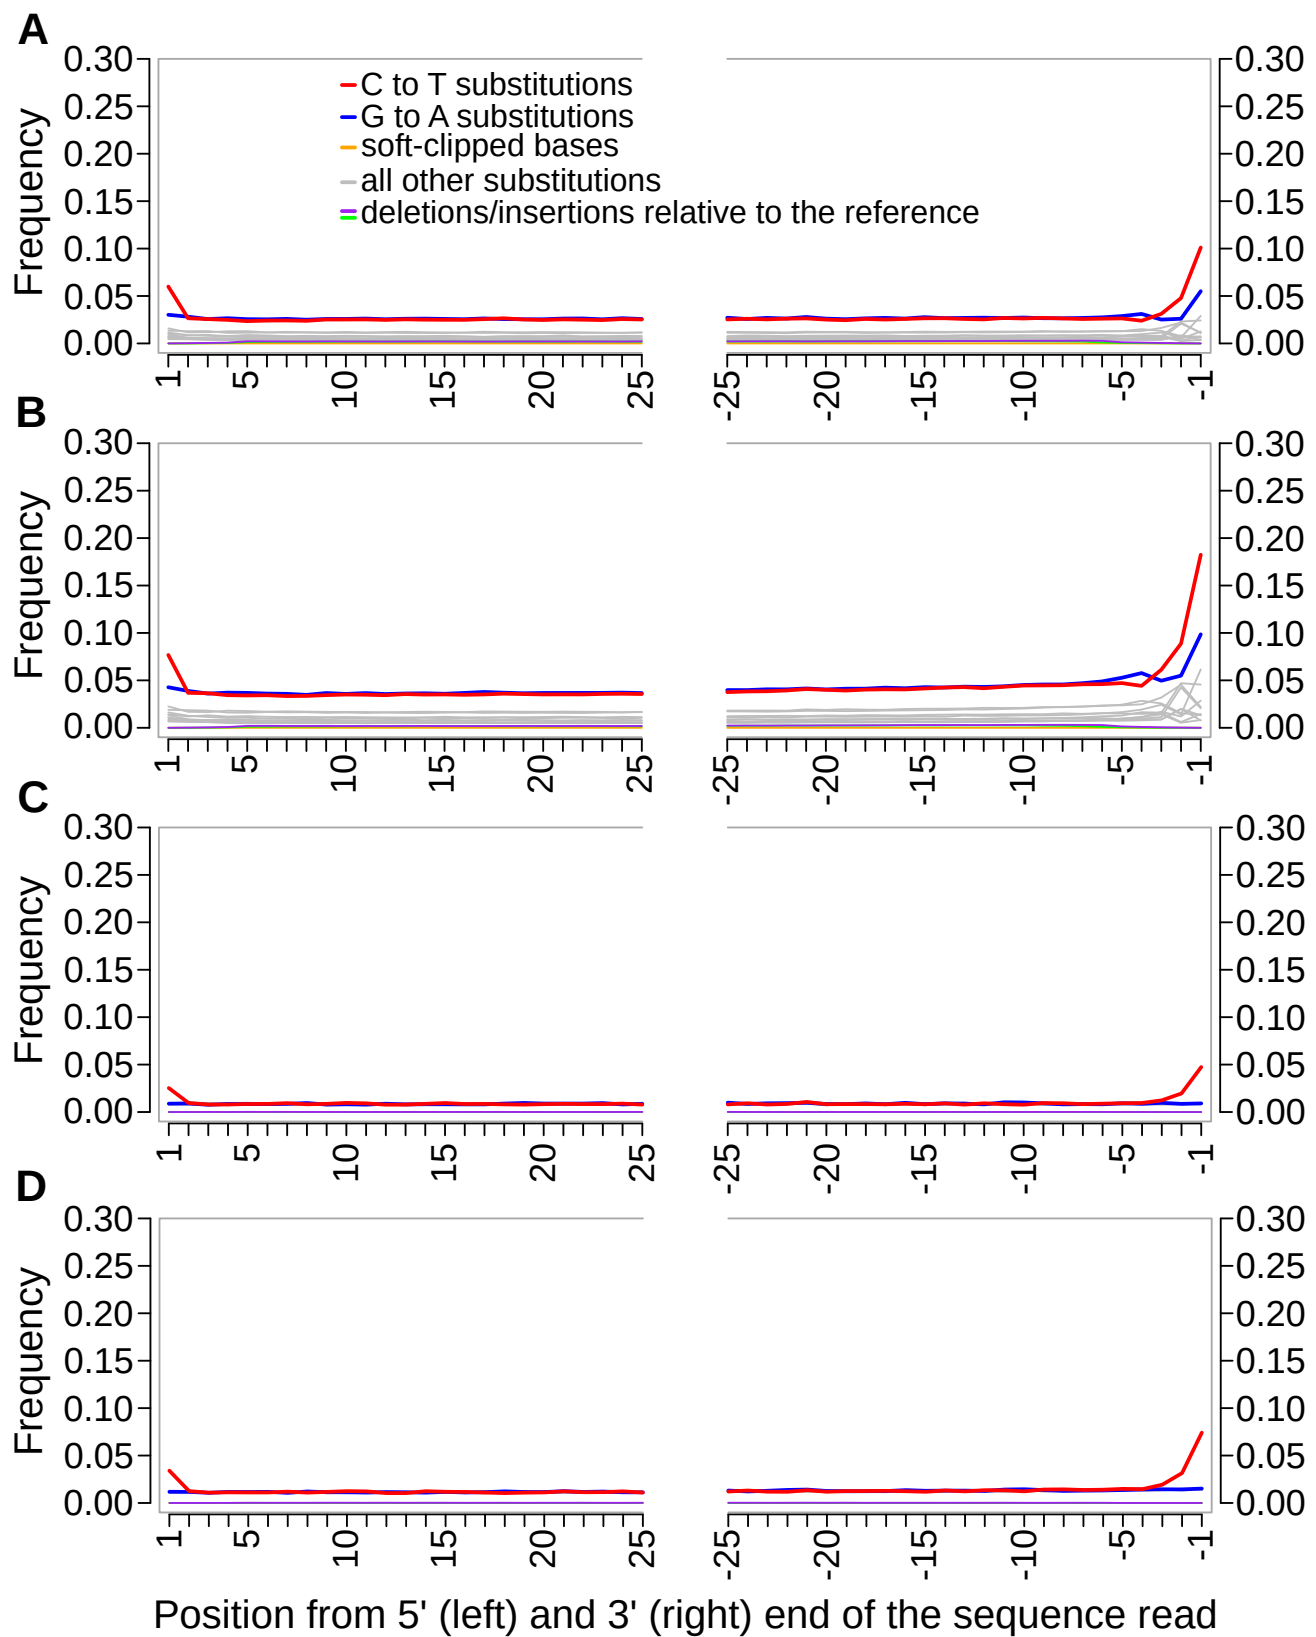

Supplement: s1 [file s1]

CPU runtime [s] depending mismatch value ( $n$ ) and seed length ( $l$ )

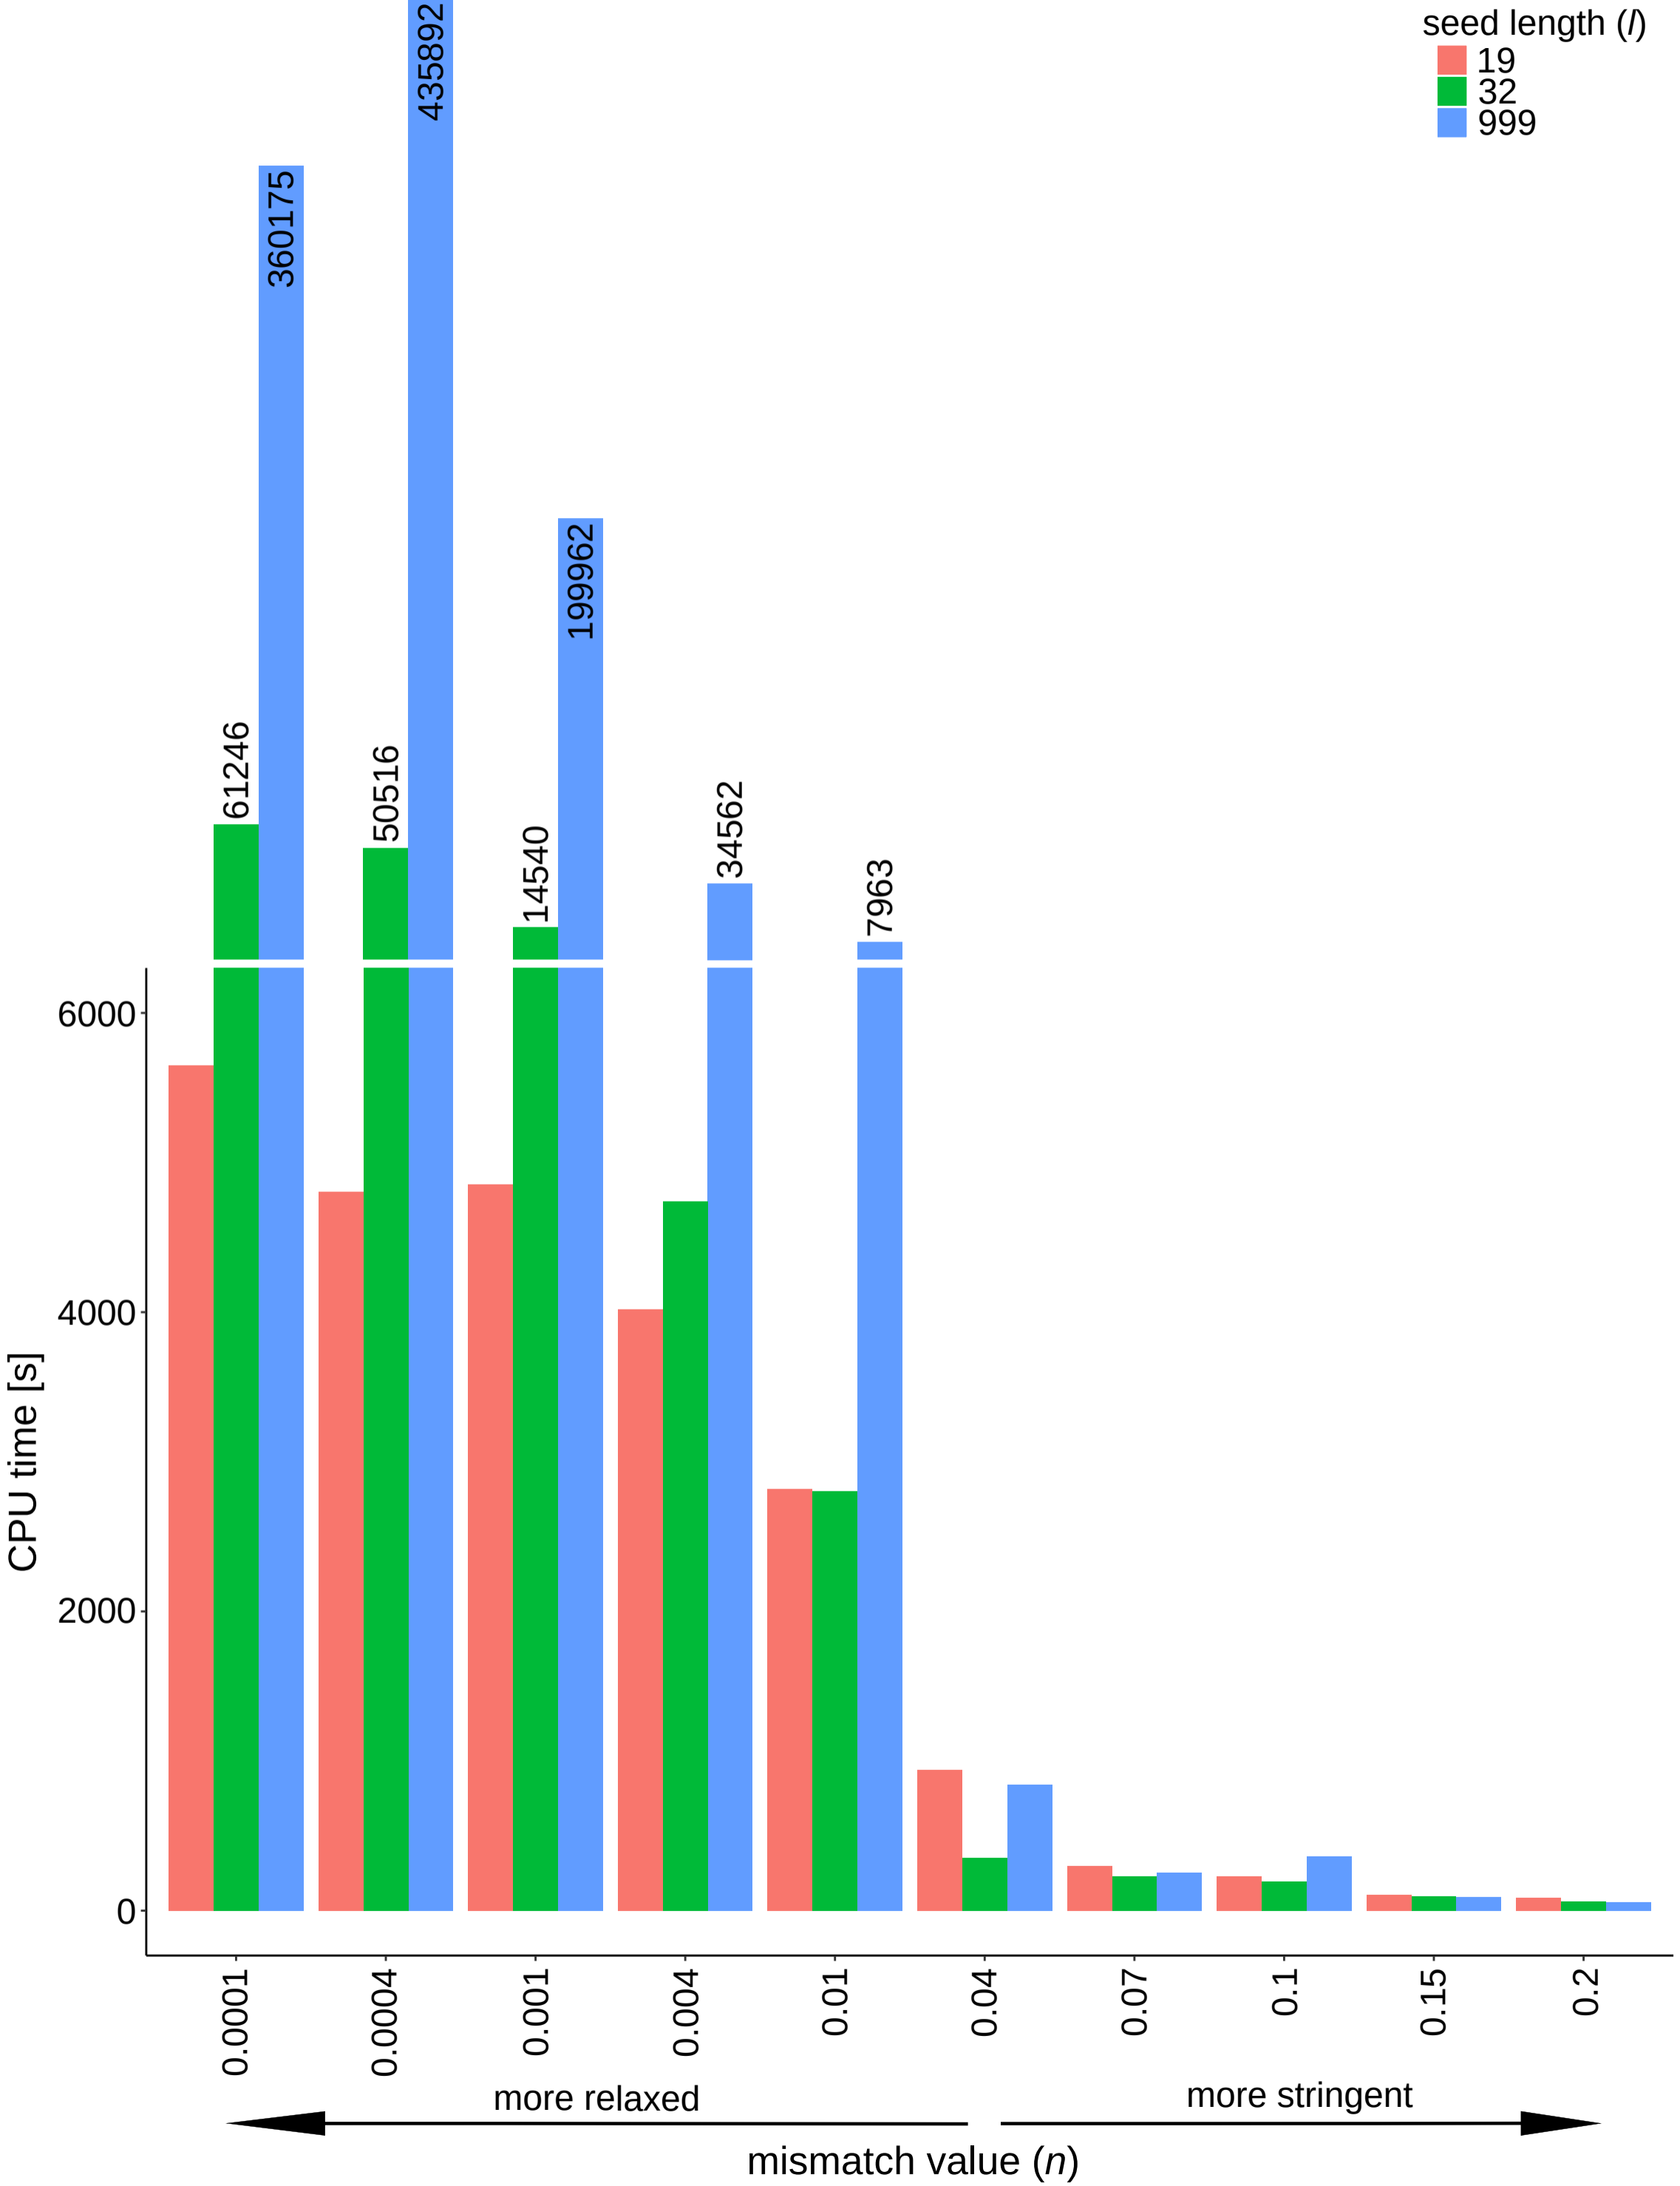

Supplement: s1 [file s1]
